# Supplementary material for: The kinetic model of cyclohexene–air combustion over a wide temperature range
Source: Royal Society of Chemistry journal article supplement (doi:10.1039/d1ra07122j), 2021-01-01
Supplement: d1ra07122j2.pdf [file d1ra07122j2.pdf]

## Supporting Information

### The kinetic model of cyclohexene-air combustion over a wide temperature range

Lu Hong-Biao<sup>a,b</sup>, Kong Wen-Hui<sup>a,b</sup>, Zhang Chang-Hua<sup>b,c</sup>, Wang Jing-Bo<sup>\*a,b</sup>, Li Xiang-Yuan<sup>a,b</sup>

<sup>a</sup> College of Chemical Engineering, Sichuan University, Chengdu 610065, China

<sup>b</sup> Engineering Research Center of Combustion and Cooling for Aerospace Power, Ministry of Education, Sichuan University, Chengdu 610065, China

<sup>c</sup> Institute of Atomic and Molecular Physics, Sichuan University, Chengdu 610065, China

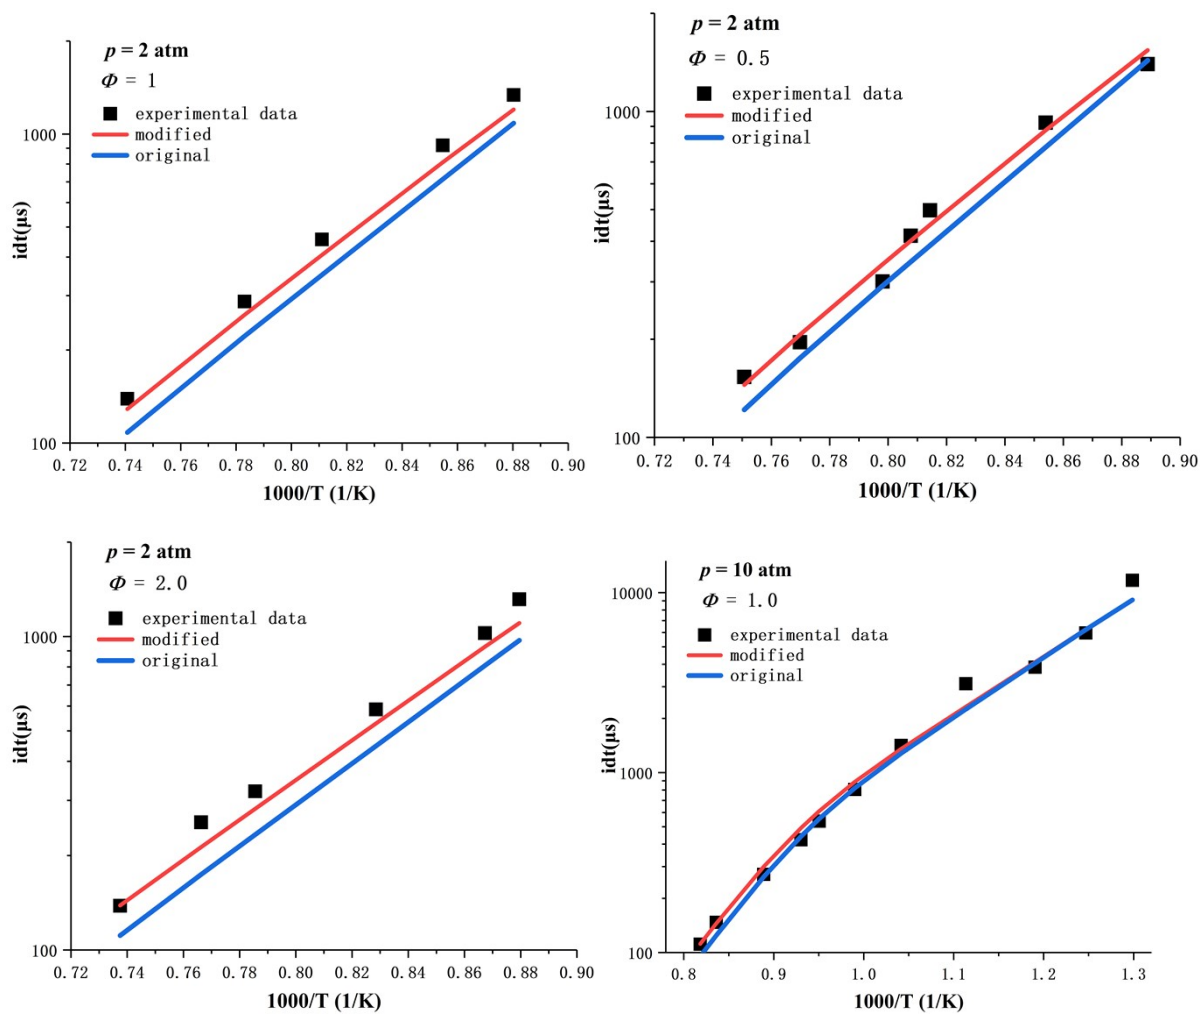

**Fig. S1** The comparison of ignition delay time simulated by original and modified rate constant of reaction R5.

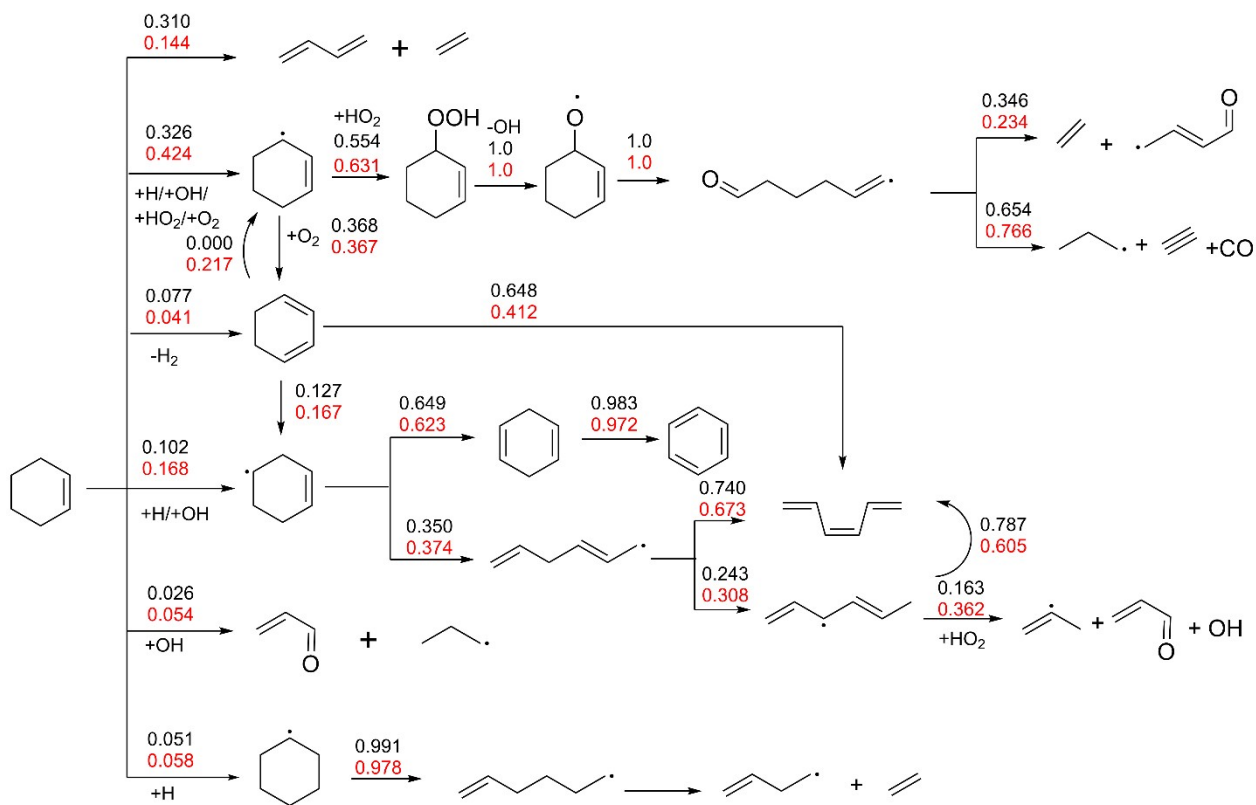

**Fig. S2** The flux analysis of 80% cyclohexene consumption under  $p = 2$  atm,  $\Phi = 1.0$ , and high temperature of 1200 K (red number) and 1350 K (black number).

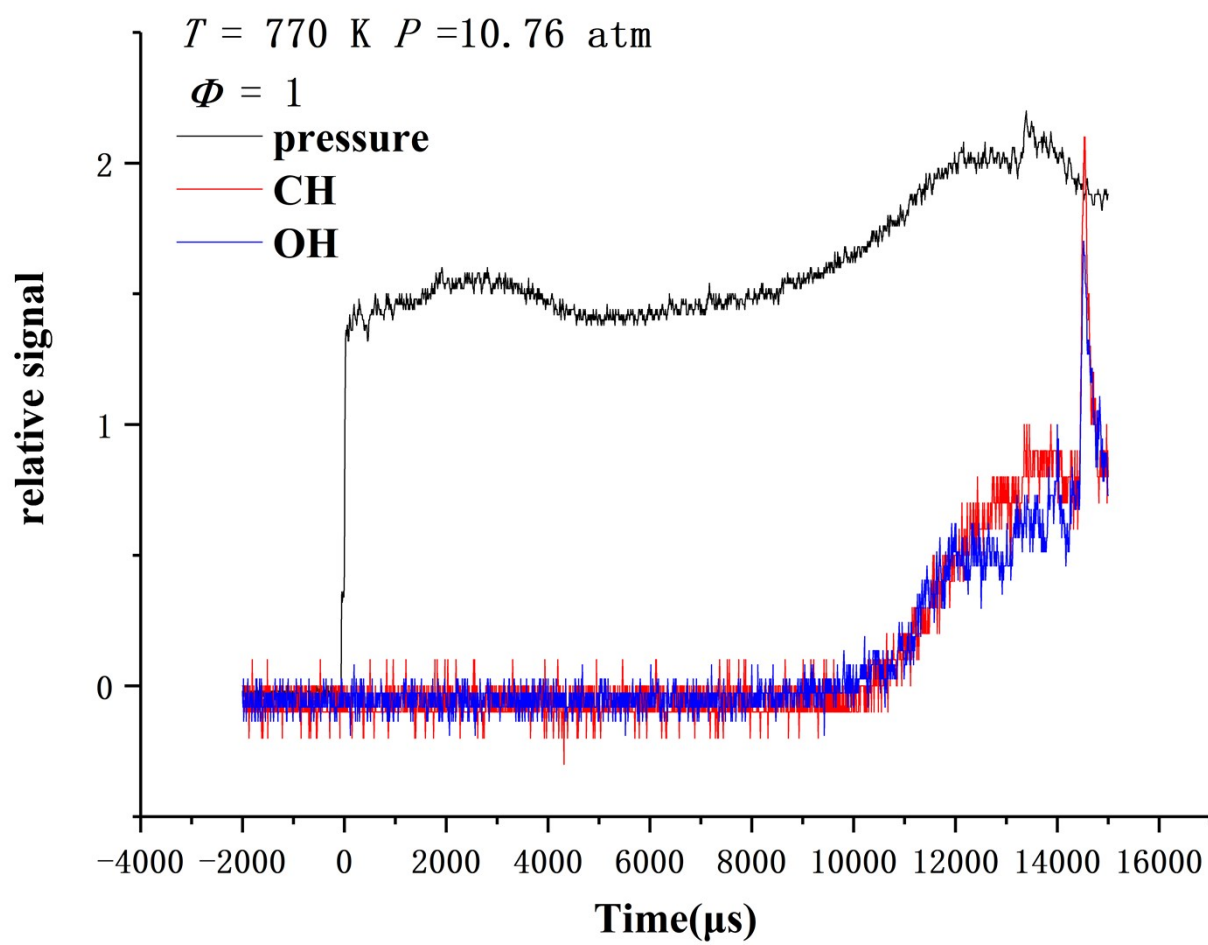

Fig. S3 The data of pressure history and CH\* trace at  $P = 10.76 \text{ atm}$ ,  $T = 770 \text{ K}$ ,  $\Phi = 1$ .

**Table S1 The ignition delay time of cyclohexene-air mixture measured in this work.**

| $\Phi=0.5$ |           |                                       | $\Phi=1.0$ |           |                                       | $\Phi=2.0$ |           |                                       |
|------------|-----------|---------------------------------------|------------|-----------|---------------------------------------|------------|-----------|---------------------------------------|
| $T$ (K)    | $p$ (atm) | $\tau_{\text{ign}}$ ( $\mu\text{s}$ ) | $T$ (K)    | $p$ (atm) | $\tau_{\text{ign}}$ ( $\mu\text{s}$ ) | $T$ (K)    | $p$ (atm) | $\tau_{\text{ign}}$ ( $\mu\text{s}$ ) |
| 1332       | 2.16      | 142                                   | 1350       | 2.14      | 130                                   | 1356       | 2.25      | 123                                   |
| 1299       | 2.2       | 178                                   | 1277       | 2.05      | 280                                   | 1305       | 2.22      | 230                                   |
| 1253       | 2.11      | 285                                   | 1233       | 2.23      | 409                                   | 1273       | 2.22      | 289                                   |
| 1238       | 2.09      | 398                                   | 1170       | 2.12      | 867                                   | 1207       | 2.23      | 525                                   |
| 1228       | 2.04      | 488                                   | 1136       | 2.13      | 1257                                  | 1153       | 2.14      | 958                                   |
| 1171       | 2.11      | 876                                   | 1222       | 9.76      | 114                                   | 1137       | 2.16      | 1217                                  |
|            |           |                                       | 1196       | 10.58     | 139                                   |            |           |                                       |
|            |           |                                       | 1125       | 10.1      | 269                                   |            |           |                                       |
|            |           |                                       | 1075       | 10        | 423                                   |            |           |                                       |
|            |           |                                       | 1052       | 10.03     | 535                                   |            |           |                                       |
|            |           |                                       | 1010       | 10.05     | 802                                   |            |           |                                       |
|            |           |                                       | 960        | 9.9       | 1429                                  |            |           |                                       |
|            |           |                                       | 898        | 10.88     | 2864                                  |            |           |                                       |
|            |           |                                       | 840        | 10.2      | 3775                                  |            |           |                                       |
|            |           |                                       | 802        | 10.43     | 5719                                  |            |           |                                       |
|            |           |                                       | 770        | 10.76     | 10885                                 |            |           |                                       |

**Table S2 Names and the corresponding molecular structures to the species involved in the kinetic model of cyclohexene.**

| Name in the mechanism | Molecular structure | Molecular formula                             |
|-----------------------|---------------------|-----------------------------------------------|
| C2H4                  |                     | C <sub>2</sub> H <sub>4</sub>                 |
| C4H6                  |                     | C <sub>4</sub> H <sub>6</sub>                 |
| C2H3CHOZ              |                     | C <sub>3</sub> H <sub>4</sub> O               |
| R19C3H7               |                     | C <sub>3</sub> H <sub>7</sub>                 |
| C5H10Z                |                     | C <sub>5</sub> H <sub>10</sub>                |
| C3H5Y                 |                     | C <sub>3</sub> H <sub>5</sub>                 |
| R10C2H3V              |                     | C <sub>2</sub> H <sub>3</sub>                 |
| iC4H5                 |                     | C <sub>4</sub> H <sub>5</sub>                 |
| R13CH2CHO             |                     | C <sub>2</sub> H <sub>3</sub> O               |
| R7CH3O                |                     | CH <sub>3</sub> O                             |
| cC6H10O               |                     | C <sub>6</sub> H <sub>10</sub> O              |
| cC6H11                |                     | C <sub>6</sub> H <sub>11</sub>                |
| cC6H10OH              |                     | C <sub>6</sub> H <sub>11</sub> O              |
| CH3cC6H10             |                     | C <sub>7</sub> H <sub>13</sub>                |
| CH3cC6H9              |                     | C <sub>7</sub> H <sub>12</sub>                |
| C6H11-16              |                     | C <sub>6</sub> H <sub>11</sub>                |
| cC6H10O2H-2           |                     | C <sub>6</sub> H <sub>11</sub> O <sub>2</sub> |
| SOOcC6O2H             |                     | C <sub>6</sub> H <sub>11</sub> O <sub>4</sub> |
| SOOcC6O               |                     | C <sub>6</sub> H <sub>10</sub> O <sub>3</sub> |
| C6H9-5                |                     | C <sub>6</sub> H <sub>9</sub>                 |
| C6H9-6                |                     | C <sub>6</sub> H <sub>9</sub>                 |
| C6H9-7                |                     | C <sub>6</sub> H <sub>9</sub>                 |
| C6H9-8                |                     | C <sub>6</sub> H <sub>9</sub>                 |
| C6H9-9                |                     | C <sub>6</sub> H <sub>9</sub>                 |

|               |                                                                                     |                                               |
|---------------|-------------------------------------------------------------------------------------|-----------------------------------------------|
| C6H9-10       | 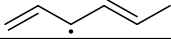   | C <sub>6</sub> H <sub>9</sub>                 |
| C6H8-125      |    | C <sub>6</sub> H <sub>8</sub>                 |
| C6H8T         |    | C <sub>6</sub> H <sub>8</sub>                 |
| cC6H11O2      |    | C <sub>6</sub> H <sub>11</sub> O <sub>2</sub> |
| RC6H9OK       |    | C <sub>6</sub> H <sub>9</sub> O               |
| CYHEXDN13     |    | C <sub>6</sub> H <sub>8</sub>                 |
| bicyclohexene |    | C <sub>6</sub> H <sub>8</sub>                 |
| HXT_trans     |    | C <sub>6</sub> H <sub>8</sub>                 |
| C6H7          |    | C <sub>6</sub> H <sub>7</sub>                 |
| CYHEXEN-3J    |    | C <sub>6</sub> H <sub>9</sub>                 |
| xC6H9OO-1     |   | C <sub>6</sub> H <sub>9</sub> O <sub>2</sub>  |
| xC6H7OO-1     |  | C <sub>6</sub> H <sub>7</sub> O <sub>2</sub>  |
| xC6H7OO-2     |  | C <sub>6</sub> H <sub>7</sub> O <sub>2</sub>  |
| xC6H8OOH-1    |  | C <sub>6</sub> H <sub>9</sub> O <sub>2</sub>  |
| xC6H8OOH-2    |  | C <sub>6</sub> H <sub>9</sub> O <sub>2</sub>  |
| xC6H8OOH-3    |  | C <sub>6</sub> H <sub>9</sub> O <sub>2</sub>  |
| xC6H9O-1      |  | C <sub>6</sub> H <sub>9</sub> O               |
| C6H9O-1       |  | C <sub>6</sub> H <sub>9</sub> O               |
| xC5H8CO-1     |  | C <sub>6</sub> H <sub>8</sub> O               |

|            |                                                                                     |                                               |
|------------|-------------------------------------------------------------------------------------|-----------------------------------------------|
| xC6H6OOH-1 | 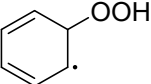   | C <sub>6</sub> H <sub>7</sub> O <sub>2</sub>  |
| C6H8OOH-4  |   | C <sub>6</sub> H <sub>9</sub> O <sub>2</sub>  |
| IC6H8      |    | C <sub>6</sub> H <sub>8</sub>                 |
| C5H7CHO-1  |    | C <sub>6</sub> H <sub>8</sub> O               |
| C6H8OOH-5  |    | C <sub>6</sub> H <sub>9</sub> O <sub>2</sub>  |
| C6H9-2     |    | C <sub>6</sub> H <sub>9</sub>                 |
| C6H6       |    | C <sub>6</sub> H <sub>6</sub>                 |
| xC6H8O-1   |   | C <sub>6</sub> H <sub>8</sub> O               |
| xC6H8O-2   |  | C <sub>6</sub> H <sub>8</sub> O               |
| xC6H8O-3   |  | C <sub>6</sub> H <sub>8</sub> O               |
| xC6H8O-4   |  | C <sub>6</sub> H <sub>8</sub> O               |
| xC6H8O-5   |  | C <sub>6</sub> H <sub>8</sub> O               |
| xC6H6O-1   |  | C <sub>6</sub> H <sub>6</sub> O               |
| xC6H7OOH-1 |  | C <sub>6</sub> H <sub>8</sub> O <sub>2</sub>  |
| xC6H7OOH-2 |  | C <sub>6</sub> H <sub>8</sub> O <sub>2</sub>  |
| xC6H5OOH-1 |  | C <sub>6</sub> H <sub>6</sub> O <sub>2</sub>  |
| xC6H9OOH-1 |  | C <sub>6</sub> H <sub>10</sub> O <sub>2</sub> |



|              |                                                                                     |                                              |
|--------------|-------------------------------------------------------------------------------------|----------------------------------------------|
| C6H7OOH-3    | 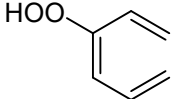   | C <sub>6</sub> H <sub>8</sub> O <sub>2</sub> |
| xC6H8OOHOO-1 |    | C <sub>6</sub> H <sub>9</sub> O <sub>4</sub> |
| xC6H8OOHOO-2 |    | C <sub>6</sub> H <sub>9</sub> O <sub>4</sub> |
| xC6H8OOHOO-3 |    | C <sub>6</sub> H <sub>9</sub> O <sub>4</sub> |
| xC5H7OOHCO-1 |    | C <sub>6</sub> H <sub>8</sub> O <sub>3</sub> |
| xC5H7OOHCO-2 |    | C <sub>6</sub> H <sub>8</sub> O <sub>3</sub> |
| xC5H7OOHCO-3 |   | C <sub>6</sub> H <sub>8</sub> O <sub>3</sub> |
| xC6H8OH-1    |  | C <sub>6</sub> H <sub>9</sub> O              |
| xC6H8OHOO-1  |  | C <sub>6</sub> H <sub>9</sub> O <sub>3</sub> |
| xC5H7OOHCO-4 |  | C <sub>6</sub> H <sub>8</sub> O <sub>3</sub> |
| xC6H7O-1     |  | C <sub>6</sub> H <sub>7</sub> O              |
| xC6H7O-2     |  | C <sub>6</sub> H <sub>7</sub> O              |
| C4H6CHOCHO-1 |  | C <sub>6</sub> H <sub>8</sub> O <sub>2</sub> |

|                |                                                                                      |                                               |
|----------------|--------------------------------------------------------------------------------------|-----------------------------------------------|
| C6H7O-3        | 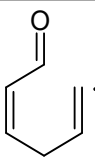    | C <sub>6</sub> H <sub>7</sub> O               |
| C6H7O-4        |     | C <sub>6</sub> H <sub>7</sub> O               |
| C4H6CHO-1      |     | C <sub>5</sub> H <sub>7</sub> O               |
| C4H6CHO-2      |     | C <sub>5</sub> H <sub>7</sub> O               |
| C4H7-3         |     | C <sub>4</sub> H <sub>7</sub>                 |
| xC6H7OHOOH-1   |    | C <sub>6</sub> H <sub>9</sub> O <sub>3</sub>  |
| xC6H7OHOOH-2   |  | C <sub>6</sub> H <sub>9</sub> O <sub>3</sub>  |
| xC6H7OHO-1     |   | C <sub>6</sub> H <sub>8</sub> O <sub>2</sub>  |
| xC6H7OHO-2     |   | C <sub>6</sub> H <sub>8</sub> O <sub>2</sub>  |
| xC6H7OHOOHOO-1 |   | C <sub>6</sub> H <sub>9</sub> O <sub>5</sub>  |
| xC6H7OHOOHOO-2 |   | C <sub>6</sub> H <sub>9</sub> O <sub>5</sub>  |
| xC6H8OOHOOH-2  |   | C <sub>6</sub> H <sub>10</sub> O <sub>4</sub> |

|                 |                                                                                     |                |
|-----------------|-------------------------------------------------------------------------------------|----------------|
| xC6H8OOHOOH-3   | 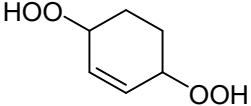   | $C_6H_{10}O_4$ |
| xC6H7OHOOHOOH-1 |    | $C_6H_{10}O_5$ |
| xC6H7OHOOHOOH-2 |    | $C_6H_{10}O_5$ |
| xC6H6OHO-3      |    | $C_6H_7O_2$    |
| xC6H6OHO-5      |    | $C_6H_7O_2$    |
| CYHEXEN         |   | $C_6H_{10}$    |
| xC6H7O-7        |  | $C_6H_7O$      |
| xC6H7O-9        |  | $C_6H_7O$      |
| xC6H6OHO-7      |  | $C_6H_7O_2$    |
| xC6H6OHO-8      |  | $C_6H_7O_2$    |
| CYHEXDN14       |  | $C_6H_8$       |
| CYHEXEN-4J      |  | $C_6H_9$       |
| C6H9-4          |  | $C_6H_9$       |
| xC5H8CO-2       |  | $C_6H_8O$      |

|                |                                                                                     |                |
|----------------|-------------------------------------------------------------------------------------|----------------|
| XC6H8OOH-7     | 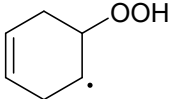   | $C_6H_9O_2$    |
| XC6H8OOH-6     |    | $C_6H_9O_2$    |
| XC6H8O-6       |    | $C_6H_8O$      |
| xC6H9OO-2      |    | $C_6H_9O_2$    |
| xC6H7OHOOH-3   |    | $C_6H_9O_3$    |
| C5H7CHO-2      |    | $C_6H_8O$      |
| xC6H8OOHOO-4   |   | $C_6H_9O_4$    |
| xC6H7OHOOHOO-5 |  | $C_6H_9O_5$    |
| xC6H7OHOOHOO-4 |  | $C_6H_9O_5$    |
| xC6H7O-10      |  | $C_6H_7O$      |
| xC6H8OHOOH-1   |  | $C_6H_{10}O_3$ |
| xC6H8OHOOH-3   |  | $C_6H_{10}O_3$ |
| xC6H8OH-3      |  | $C_6H_9O$      |

|                |  |                                              |
|----------------|--|----------------------------------------------|
| xC6H8OHOO-3    |  | C <sub>6</sub> H <sub>8</sub> O <sub>3</sub> |
| xC6H8OHOO-4    |  | C <sub>6</sub> H <sub>9</sub> O <sub>3</sub> |
| xC6H7OHOOH-4   |  | C <sub>6</sub> H <sub>9</sub> O <sub>3</sub> |
| xC6H7OHO-3     |  | C <sub>6</sub> H <sub>8</sub> O <sub>2</sub> |
| xC6H7OHO-4     |  | C <sub>6</sub> H <sub>8</sub> O <sub>2</sub> |
| xC6H7OHOOHOO-6 |  | C <sub>6</sub> H <sub>9</sub> O <sub>5</sub> |
| xC6H7OHOOH-5   |  | C <sub>6</sub> H <sub>9</sub> O <sub>3</sub> |
| xC6H7OHOOH-6   |  | C <sub>6</sub> H <sub>9</sub> O <sub>3</sub> |
| xC6H7OHO-5     |  | C <sub>6</sub> H <sub>8</sub> O <sub>2</sub> |
| xC6H6OHO-6     |  | C <sub>6</sub> H <sub>7</sub> O <sub>2</sub> |

|             |                                                                                     |                                              |
|-------------|-------------------------------------------------------------------------------------|----------------------------------------------|
| xC6H6OHO-9  | 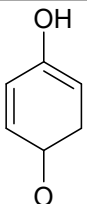   | C <sub>6</sub> H <sub>7</sub> O <sub>2</sub> |
| C4H5COCHO-1 |    | C <sub>6</sub> H <sub>6</sub> O <sub>2</sub> |
| C5H5OHCHO-1 |    | C <sub>6</sub> H <sub>7</sub> O <sub>2</sub> |
| xC6H8OHO-1  |    | C <sub>6</sub> H <sub>9</sub> O <sub>2</sub> |
| xC6H8OHO-2  |   | C <sub>6</sub> H <sub>9</sub> O <sub>2</sub> |
| C5H7OHCHO-1 |  | C <sub>6</sub> H <sub>9</sub> O <sub>2</sub> |
| C5H7OHCHO-2 |  | C <sub>6</sub> H <sub>9</sub> O <sub>2</sub> |
| C3H6OH-1    |  | C <sub>3</sub> H <sub>7</sub> O              |
| IC6H8OH-1   |  | C <sub>6</sub> H <sub>9</sub> O              |
| IC6H8OH-2   |  | C <sub>6</sub> H <sub>9</sub> O              |
| IC6H8OH-3   |  | C <sub>6</sub> H <sub>9</sub> O              |
| IC6H8O-2    |  | C <sub>6</sub> H <sub>8</sub> O              |

|              |                                                                                     |             |
|--------------|-------------------------------------------------------------------------------------|-------------|
| IC6H8O-1     | 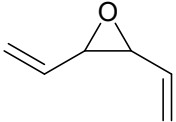   | $C_6H_8O$   |
| IC6H8OHOO-1  |    | $C_6H_9O_3$ |
| IC6H8OHOO-2  |    | $C_6H_9O_3$ |
| IC6H8OHOO-3  |    | $C_6H_9O_3$ |
| IC6H8OHOO-4  |    | $C_6H_9O_3$ |
| IC6H7OHOOH-2 |    | $C_6H_9O_3$ |
| IC6H8OH-4    |   | $C_6H_9O$   |
| IC6H8OHOO-5  |  | $C_6H_9O_3$ |
| IC6H7OHOOH-4 |  | $C_6H_9O_3$ |
| IC5H7CHO-1   |  | $C_6H_8O$   |
| IC6H7OHO-1   |  | $C_6H_8O_2$ |
| IC6H7OHO-2   |  | $C_6H_8O_2$ |
| IC4H5CHO-1   |  | $C_5H_6O$   |
| IC6H7-1      |  | $C_6H_7$    |
| IC6H7OOH-1   |  | $C_6H_8O_2$ |
| IC6H7OOH-2   |  | $C_6H_8O_2$ |

|            |                                                                                     |             |
|------------|-------------------------------------------------------------------------------------|-------------|
| IC6H7OOH-3 | 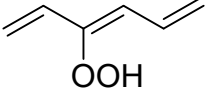   | $C_6H_8O_2$ |
| IC6H7OOH-4 |    | $C_6H_8O_2$ |
| IC6H7OOH-5 |    | $C_6H_8O_2$ |
| IC6H7O-1   |    | $C_6H_7O$   |
| IC6H7O-2   |    | $C_6H_7O$   |
| IC6H7O-3   |    | $C_6H_7O$   |
| IC6H7O-4   |    | $C_6H_7O$   |
| IC6H7O-5   |    | $C_6H_7O$   |
| IC6H7O2-1  |    | $C_6H_7O_2$ |
| IC6H7O2-2  |   | $C_6H_7O_2$ |
| IC6H7O2-3  |  | $C_6H_7O_2$ |
| IC6H7O2-4  |  | $C_6H_7O_2$ |
| IC6H7O2-5  |  | $C_6H_7O_2$ |
| IC6H7O2-6  |  | $C_6H_7O_2$ |
